# Supplementary material
Source: publisher site journal article supplement (https://e-cmh.org/upload/media/cmh-2024-0330-Supplementary-Fig-5.pdf)
Supplement: Supplementary file 1 [file cmh-2024-0330-Supplementary-Fig-5.pdf]

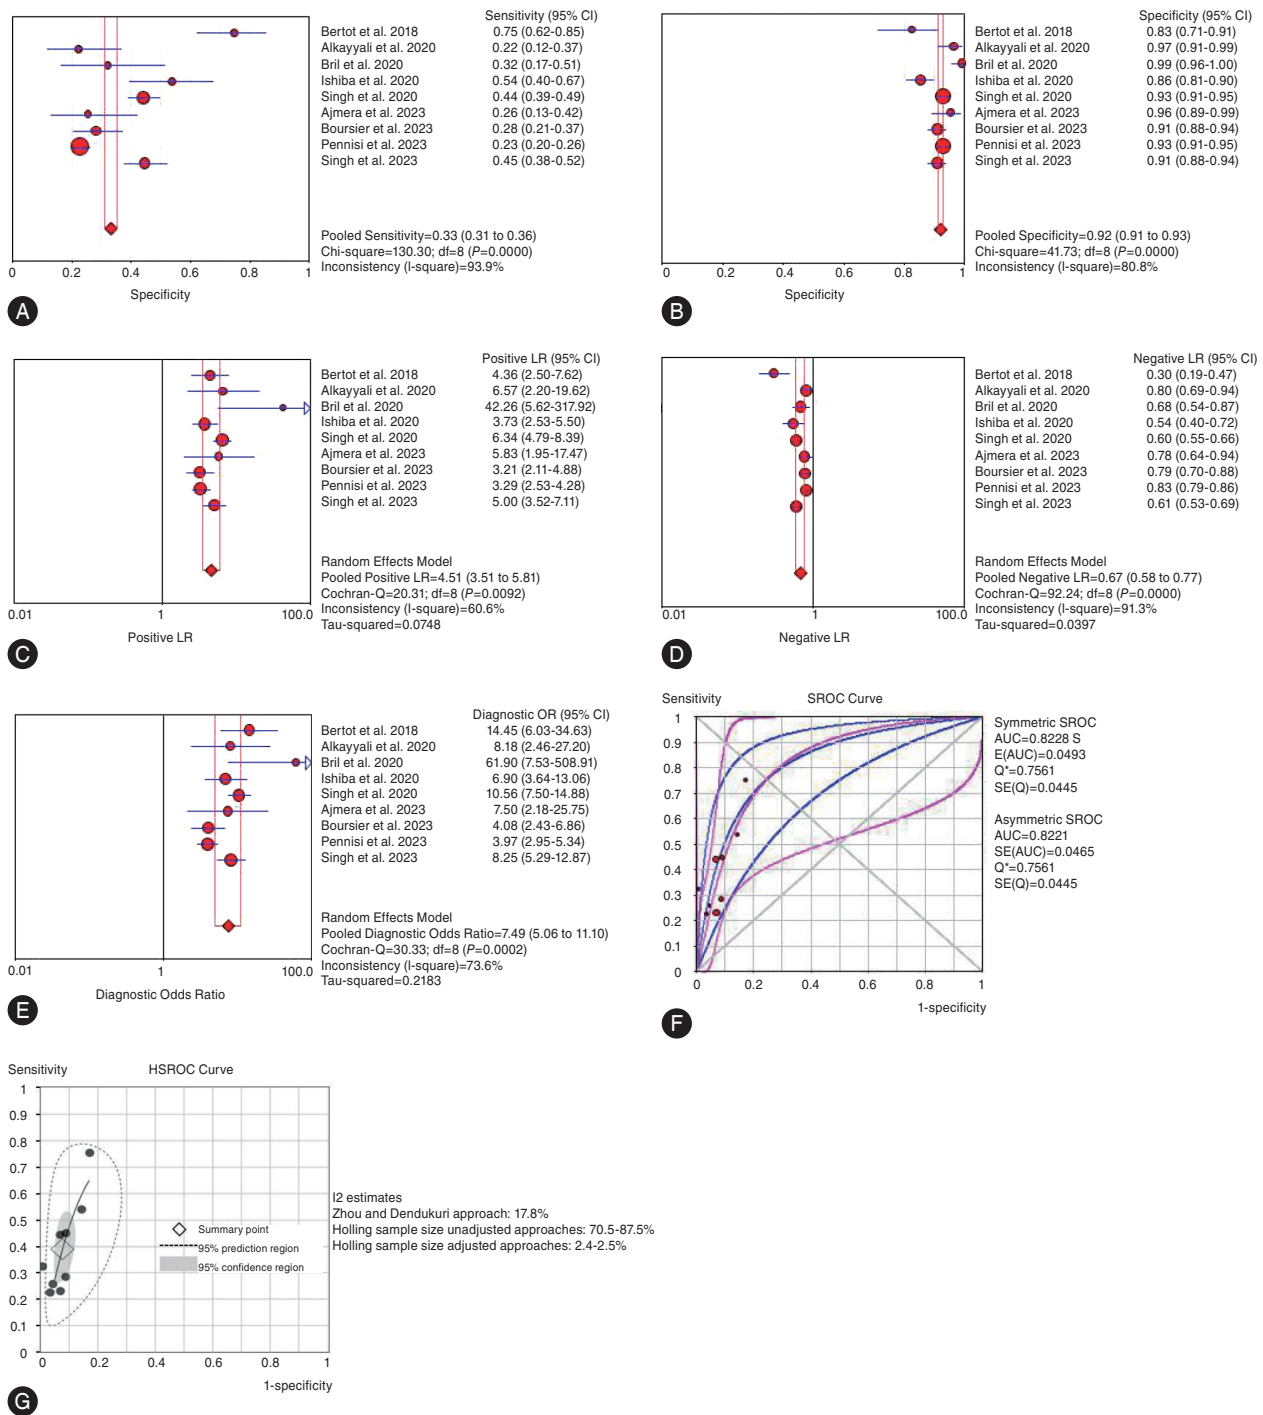

**Supplementary Figure 5.** Results of meta-analysis for diagnostic accuracy of FIB-4 for advanced liver fibrosis in high-risk group. (A) Sensitivity. (B) Specificity. (C) Positive likelihood ratio (LR). (D) Negative LR. (E) Diagnostic odds ratio (OR). (F) Summary receiver operating curve (SROC). (G) Hierarchical summary receiver operating characteristic (HSROC). FIB-4, fibrosis-4; CI, confidence interval; AUC, area under the curve.
